# Supplementary material for: The excited-state relaxation mechanism of potential UVA-activated phototherapeutic molecules: trajectory surface hopping simulations of both 4-thiothymine and 2,4-dithiothymine
Source: Royal Society of Chemistry journal article supplement (doi:10.1039/d0cp01450h), 2020-01-01
Supplement: d0cp01450h1.pdf [file d0cp01450h1.pdf]

### Supplementary Information for

Excited-state relaxation mechanism of potential UVA-activated phototherapy molecules: trajectory surface hopping simulations of both 4-thiothymine and 2,4-dithiothymine

Jun Cao,<sup>\*,1,2</sup> Dong-chu Chen<sup>1</sup>

<sup>1</sup>*School of Materials Science and Energy Engineering, Foshan University, Foshan, Guangdong, 528000, P. R. China*

<sup>2</sup>*Guizhou Provincial Key Laboratory of Computational Nano-material Science, Guizhou Education University, Guiyang, Guizhou, 550018, P. R. China*

#### Contents:

**Table S1.** Relative energies (kcal/mol) of the optimized structures of 4-thiothymine.

**Table S2.** Relative energies (kcal/mol) of the optimized structures of 2,4-dithiothymine.

**Table S3.** Absolute values of the calculated singlet-triplet splitting at the optimized excited singlet state minima in vacuum at different level of theory.

**Table S4.** Absolute values of the calculated  $S_2$ - $T_3$  splitting at the twenty  $S_2/T_3$  crossing points of 4-thiothymine in water at different level of theory.

**Figure S1.** The (TD-)B3LYP/6-31G\* optimized geometrical parameters of both molecules.

**Figure S2.** The molecular orbitals at the Franck-Condon geometry of 4-thiothymine optimized at the B3LYP/6-31G\* level.

**Figure S3.** The molecular orbitals at the Franck-Condon geometry of 2,4-dithiothymine optimized at the B3LYP/6-31G\* level.

**Figure S4.** Net population transfer among the electronic states of 4-thiothymine.

**Figure S5.** Time-evolution of the C2-O7 ( $r_{27}$ ) bond-length and its ensemble-averaged value, as well as the S8-N1-N3-C5 pyramidalization angle for 4-thiothymine.

**Figure S6.** Distribution of  $p_{8435}$  vs.  $p_{8135}$  of the  $S_2 \rightarrow S_1$  crossing points for 4-thiothymine.

**Figure S7.** Distribution of  $p_{8435}$  vs.  $p_{8135}$  of the singlet  $\rightarrow$  triplet crossing points for 4-thiothymine.

**Figure S8.** Net population transfer among the electronic states of 2,4-dithiothymine.

**Figure S9.** Time-evolution of the S7-C2-N1-N3, S7-C5-N1-N3, and S8-N1-N3-C5 pyramidalization angles of 2,4-dithiothymine.

**Figure S10.** Distribution of both hopping time and key geometrical parameters at the  $S_3 \rightarrow S_2$  and  $S_2 \rightarrow S_1$  hopping points for 2,4-dithiothymine.

**Figure S11.** Distribution of bond-length and pyramidalization angles at the singlet to triplet crossing points for 2,4-dithiothymine.

**S1.** Cartesian coordinates of the structures optimized at the (TD-)B3LYP/6-31G\* level.

**Table S1.** Relative energies (eV) of the optimized structures of 4-thiothymine at different level of theory.

| Minima structure                                              | State                                                         | TD-B3LYP/6-31G* | MS-CASPT2//CAS(12,9)/ANO-L <sup>a</sup> | Exp. <sup>a</sup> |
|---------------------------------------------------------------|---------------------------------------------------------------|-----------------|-----------------------------------------|-------------------|
| 4tT_S <sub>0</sub>                                            | S <sub>0</sub>                                                | 0.00            | 0.0                                     | 3.70<br>(335 nm)  |
|                                                               | S <sub>1</sub> (n <sub>8</sub> π <sub>8</sub> <sup>*</sup> )  | 2.90            | 2.87                                    |                   |
|                                                               | S <sub>2</sub> (π <sub>56</sub> π <sub>8</sub> <sup>*</sup> ) | 4.61            | 4.17                                    |                   |
|                                                               | S <sub>3</sub> (π <sub>8</sub> π <sub>8</sub> <sup>*</sup> )  | 4.90            |                                         |                   |
| 4tT_ <sup>1</sup> n <sub>8</sub> π <sub>8</sub> <sup>*</sup>  | S <sub>1</sub> (n <sub>8</sub> π <sub>8</sub> <sup>*</sup> )  | 2.62            | 2.51                                    |                   |
| 4tT_ <sup>1</sup> π <sub>56</sub> π <sub>8</sub> <sup>*</sup> | S <sub>2</sub> (π <sub>56</sub> π <sub>8</sub> <sup>*</sup> ) | 4.17            | 3.44                                    | 3.10              |
| 4tT_ <sup>3</sup> π <sub>56</sub> π <sub>8</sub> <sup>*</sup> | T <sub>1</sub> (π <sub>56</sub> π <sub>8</sub> <sup>*</sup> ) | 2.17            | 2.34                                    | 2.29              |
| 4tT_ <sup>3</sup> n <sub>8</sub> π <sub>8</sub> <sup>*</sup>  | T <sub>2</sub> (n <sub>8</sub> π <sub>8</sub> <sup>*</sup> )  | 2.29            |                                         |                   |

<sup>a</sup> Ref. 10 in the main text.

**Table S2.** Relative energies (eV) of the optimized structures of 2,4-dithiothymine at different level of theory.

| Minima                                                         | State                                                        | TD- B3LYP/6-31G* | MS-CASPT2//CAS(16,12)/6-31G <sup>*a</sup> | Exp. <sup>b</sup> |
|----------------------------------------------------------------|--------------------------------------------------------------|------------------|-------------------------------------------|-------------------|
| 24dtT_S <sub>0</sub>                                           | S <sub>0</sub>                                               | 0.00             | 0.00                                      | 3.39<br>(365 nm)  |
|                                                                | S <sub>1</sub> (n <sub>8</sub> π <sub>8</sub> <sup>*</sup> ) | 2.87             | 2.90                                      |                   |
|                                                                | S <sub>2</sub> (n <sub>7</sub> π <sub>7</sub> <sup>*</sup> ) | 3.55             | 3.69                                      |                   |
|                                                                | S <sub>3</sub> (π <sub>7</sub> π <sub>8</sub> <sup>*</sup> ) | 3.59             | 3.71                                      |                   |
| 24dtT_ <sup>1</sup> n <sub>8</sub> π <sub>8</sub> <sup>*</sup> | S <sub>1</sub> (n <sub>8</sub> π <sub>8</sub> <sup>*</sup> ) | 2.60             | 2.56                                      |                   |
| 24dtT_ <sup>1</sup> π <sub>7</sub> π <sub>8</sub> <sup>*</sup> | S <sub>2</sub> (π <sub>7</sub> π <sub>8</sub> <sup>*</sup> ) | 2.91             | 3.35                                      |                   |
| 24dtT_ <sup>3</sup> π <sub>8</sub> π <sub>8</sub> <sup>*</sup> | T <sub>1</sub> (π <sub>8</sub> π <sub>8</sub> <sup>*</sup> ) | 2.14             | 2.33                                      | 2.29              |
| 24dtT_ <sup>3</sup> n <sub>8</sub> π <sub>8</sub> <sup>*</sup> | T <sub>2</sub> (n <sub>8</sub> π <sub>8</sub> <sup>*</sup> ) | 2.26             |                                           |                   |

<sup>a</sup> ref.15 in the main text.

<sup>b</sup> ref.s 3 and 6 in the main text.

**Table S3.** Absolute values of the calculated singlet-triplet splitting at the optimized excited singlet state minima in vacuum at different level of theory.

| 4-thiothymine                                                 |                                  |                                   |              |                      |
|---------------------------------------------------------------|----------------------------------|-----------------------------------|--------------|----------------------|
| Minimum                                                       |                                  | MS-CASPT2                         | TD-          | MS(6)-CASPT2(12,9)// |
|                                                               |                                  | //CASSCF(12,9)/ANO-L <sup>a</sup> | B3LYP/6-31G* | TD-B3LYP/6-31G*      |
| 4tT_ <sup>1</sup> n <sub>8</sub> π <sub>8</sub> <sup>*</sup>  | S <sub>1</sub> -T <sub>1</sub> : | 0.04                              | 0.26         | 0.05                 |
|                                                               | S <sub>1</sub> -T <sub>2</sub> : | 0.14                              | 0.30         | 0.21                 |
| 4tT_ <sup>1</sup> π <sub>56</sub> π <sub>8</sub> <sup>*</sup> | S <sub>2</sub> -T <sub>3</sub> : |                                   | 0.31         | 0.66                 |
|                                                               | S <sub>2</sub> -T <sub>2</sub> : | 0.73                              | 1.57         | 0.57                 |

| 2,4-dithiothymine                                                         |                                  |                                |                                |              |                       |
|---------------------------------------------------------------------------|----------------------------------|--------------------------------|--------------------------------|--------------|-----------------------|
| Minimum                                                                   |                                  | TD//                           | MS-CASPT2//                    | TD-B3LYP//   | MS(6)-CASPT2(16,12)// |
|                                                                           |                                  | CAS(16,12)/6-31G* <sup>b</sup> | CAS(16,12)/6-31G* <sup>c</sup> | B3LYP/6-31G* | B3LYP/6-31G*          |
| 24dfT <sub>1</sub> <sup>n<sub>8</sub></sup> π <sub>8</sub> * <sup>a</sup> | S <sub>1</sub> -T <sub>1</sub> : | 0.27                           | 0.02                           | 0.27         | 0.01                  |
|                                                                           | S <sub>1</sub> -T <sub>2</sub> : | 0.29                           | 0.01                           | 0.30         | 0.16                  |
| 24dfT <sub>1</sub> <sup>π<sub>7</sub></sup> π <sub>8</sub> * <sup>a</sup> | S <sub>2</sub> -T <sub>3</sub> : | 0.13                           | 0.11                           | 0.09         | 0.08                  |
|                                                                           | S <sub>2</sub> -T <sub>2</sub> : | 0.27                           | 0.48                           | 0.17         | 0.25                  |

<sup>a</sup> ref. 10 in the main text.

<sup>b</sup> the structures are taken from ref. 15 in the main text.

<sup>c</sup> ref. 15 in the main text.

**Table S4.** Absolute values of the calculated S<sub>2</sub>-T<sub>3</sub> splitting (eV) at the twenty S<sub>2</sub>/T<sub>3</sub> crossing points of 4-thiothymine in water at different level of theory.

| Points   | TD-B3LYP/6-31G* | MS(6)-CASPT2(12,9)//TD-B3LYP6-31G* |
|----------|-----------------|------------------------------------|
| Point 1  | 0.12            | 0.28                               |
| Point 2  | 0.15            | 0.13                               |
| Point 3  | 0.15            | 0.11                               |
| Point 4  | 0.1             | 0.07                               |
| Point 5  | 0.01            | 0.18                               |
| Point 6  | 0.25            | 0.01                               |
| Point 7  | 0.42            | 0.08                               |
| Point 8  | 0.29            | 0.14                               |
| Point 9  | 0.12            | 0.14                               |
| Point 10 | 0.18            | 0.13                               |
| Point 11 | 0.47            | 0.57                               |
| Point 12 | 0.13            | 0.19                               |
| Point 13 | 0.11            | 0.08                               |
| Point 14 | 0.04            | 0.08                               |
| Point 15 | 0.2             | 0.26                               |
| Point 16 | 0.1             | 0.05                               |
| Point 17 | 0.21            | 0.04                               |
| Point 18 | 0.16            | 0.32                               |
| Point 19 | 0.2             | 0.16                               |
| Point 20 | 0.16            | 0.13                               |

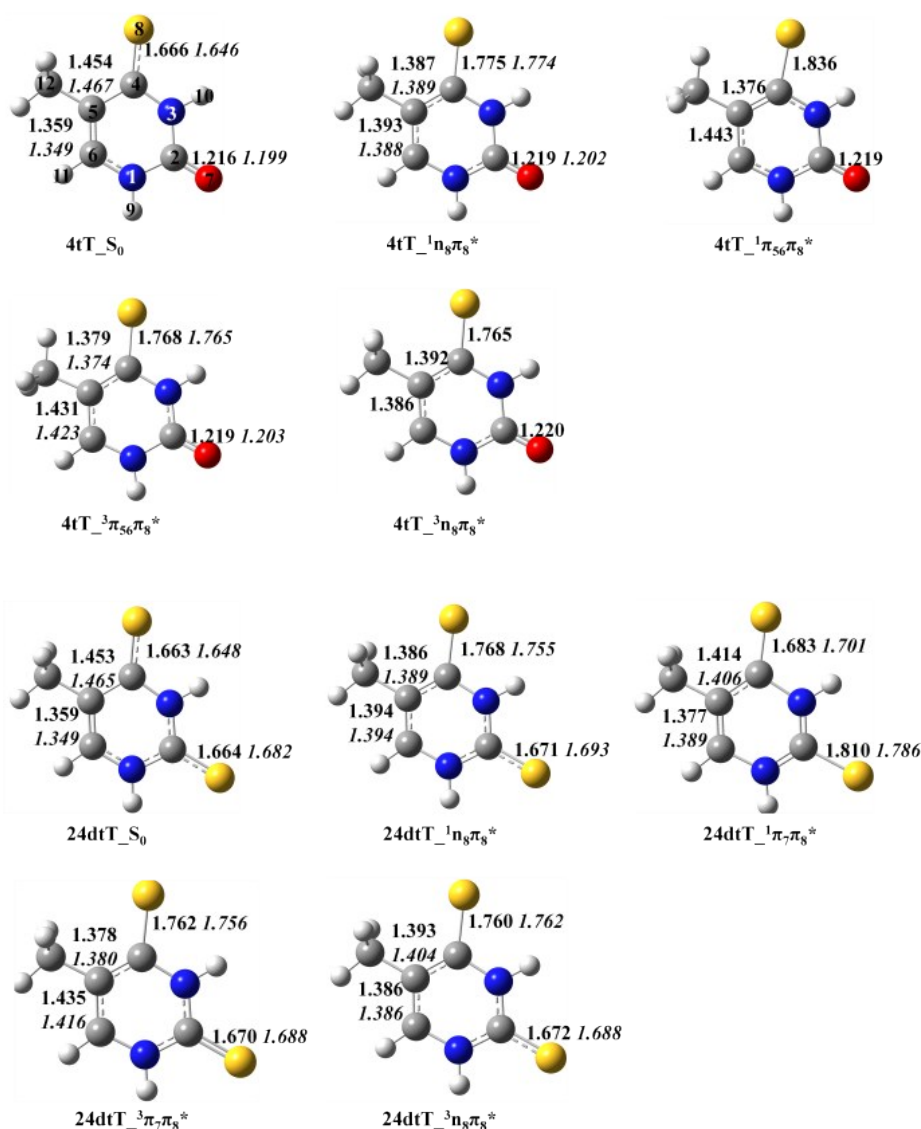

**Figure S1.** Some key geometrical parameters (bond-length unit in angstrom, Å) of the optimized structures in different electronic states, along with the atom numbering scheme in the S<sub>0</sub> minimum of 4-thiothymine (4tT\_S<sub>0</sub>). The excited state minima of 4-thiothymine in the S<sub>1</sub>, S<sub>2</sub>, T<sub>1</sub>, and T<sub>2</sub> surfaces, of n<sub>8</sub>π<sub>8</sub><sup>\*</sup>, π<sub>56</sub>π<sub>8</sub><sup>\*</sup>, π<sub>56</sub>π<sub>8</sub><sup>\*</sup>, and n<sub>8</sub>π<sub>8</sub><sup>\*</sup> character, are referred as 4tT\_1n<sub>8</sub>π<sub>8</sub><sup>\*</sup>, 4tT\_1π<sub>56</sub>π<sub>8</sub><sup>\*</sup>, 4tT\_3π<sub>56</sub>π<sub>8</sub><sup>\*</sup>, and 4tT\_3n<sub>8</sub>π<sub>8</sub><sup>\*</sup>, respectively, in this figure. For 2,4-dithiothymine, the minimum in the S<sub>0</sub> state and the excited S<sub>1</sub>, S<sub>2</sub>, T<sub>1</sub>, and T<sub>2</sub> surfaces, of n<sub>8</sub>π<sub>8</sub><sup>\*</sup>, π<sub>7</sub>π<sub>8</sub><sup>\*</sup>, π<sub>8</sub>π<sub>8</sub><sup>\*</sup>, and n<sub>8</sub>π<sub>8</sub><sup>\*</sup> character, are referred as 24dtT\_S<sub>0</sub>, 24dtT\_1n<sub>8</sub>π<sub>8</sub><sup>\*</sup>, 24dtT\_1π<sub>7</sub>π<sub>8</sub><sup>\*</sup>, 24dtT\_3π<sub>7</sub>π<sub>8</sub><sup>\*</sup>, and 24dtT\_3n<sub>8</sub>π<sub>8</sub><sup>\*</sup>, respectively, in this figure. See Section S1 of ESI for Cartesian coordinates of these structures. The italic ones for 4-thiothymine are from optimizations at the CAS(12,9)/6-31G\* level, and the italic ones for 2,4-dithiothymine are taken from ref.

15 in the main text.

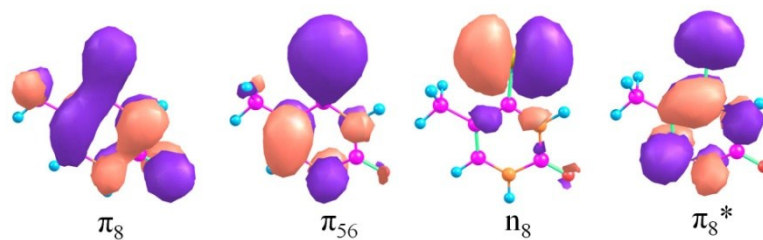

**Figure S2.** The molecular orbitals at the Franck-Condon geometry of 4-thiothymine optimized at the B3LYP/6-31G\* level.

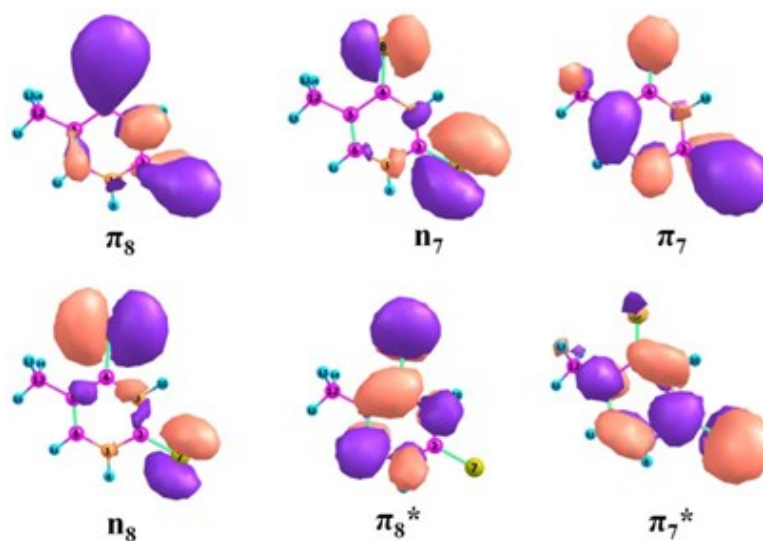

**Figure S3.** The molecular orbitals at the Franck-Condon geometry of 2,4-dithiothymine optimized at the B3LYP/6-31G\* level.

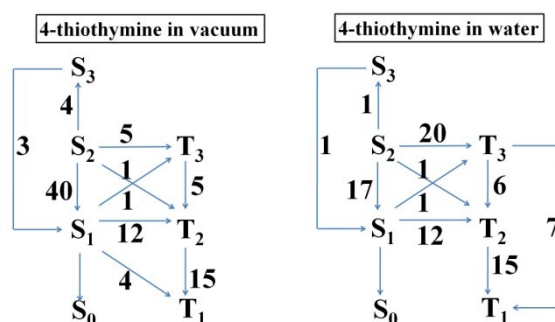

**Figure S4.** Net population transfer (numbers of trajectories) among the electronic states of 4-thiothymine.

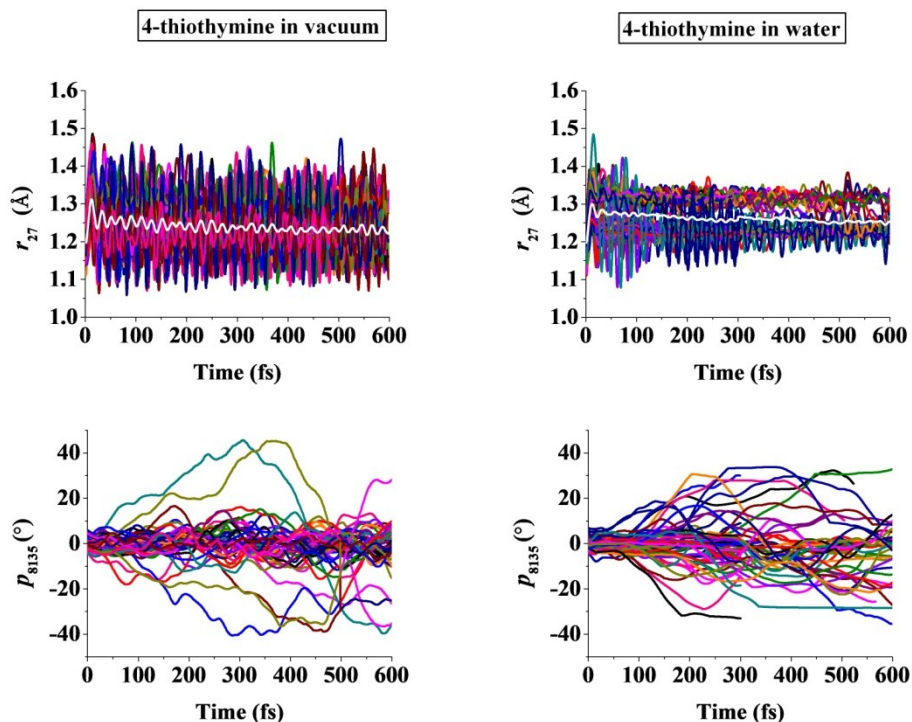

**Figure S5.** Time-evolution of the C2-O7 ( $r_{27}$ ) bond-length and its ensemble-averaged value (the white line), as well as the S8-N1-N3-C5 pyramidalization angle ( $p_{8135}$ ) for 4-thiothymine. Bond-length unit in angstrom, Å, and pyramidalization angle unit in degrees, °. Different trajectories are coded by color.

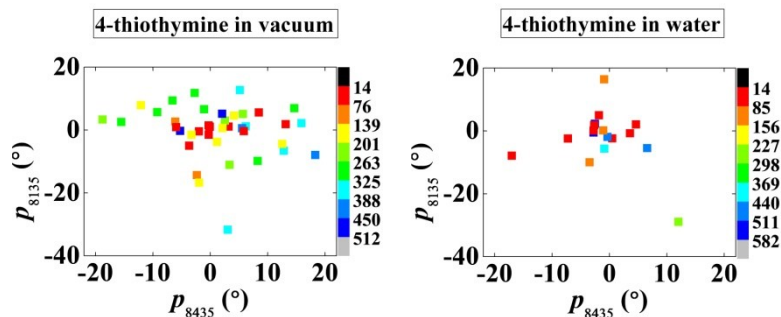

**Figure S6.** Distribution of  $p_{8435}$  vs.  $p_{8135}$  of the  $S_2 \rightarrow S_1$  crossing points for 4-thiothymine. Bond-length unit in angstrom, Å, and pyramidalization angle unit in degrees, °.

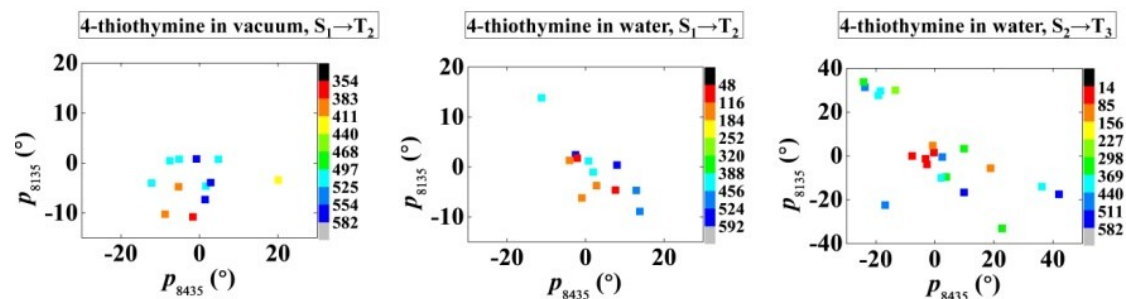

**Figure S7.** Distribution of  $p_{8435}$  vs.  $p_{8135}$  of the singlet  $\rightarrow$  triplet crossing points for 4-thiothymine. Bond-length unit in angstrom, Å, and pyramidalization angle unit in

degrees, °.

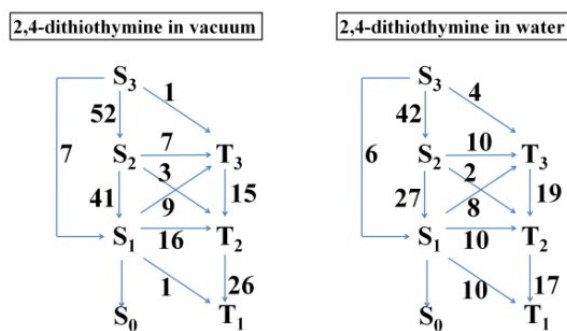

**Figure S8.** Net population transfer (numbers of trajectories) among the electronic states of 2,4-dithiothymine.

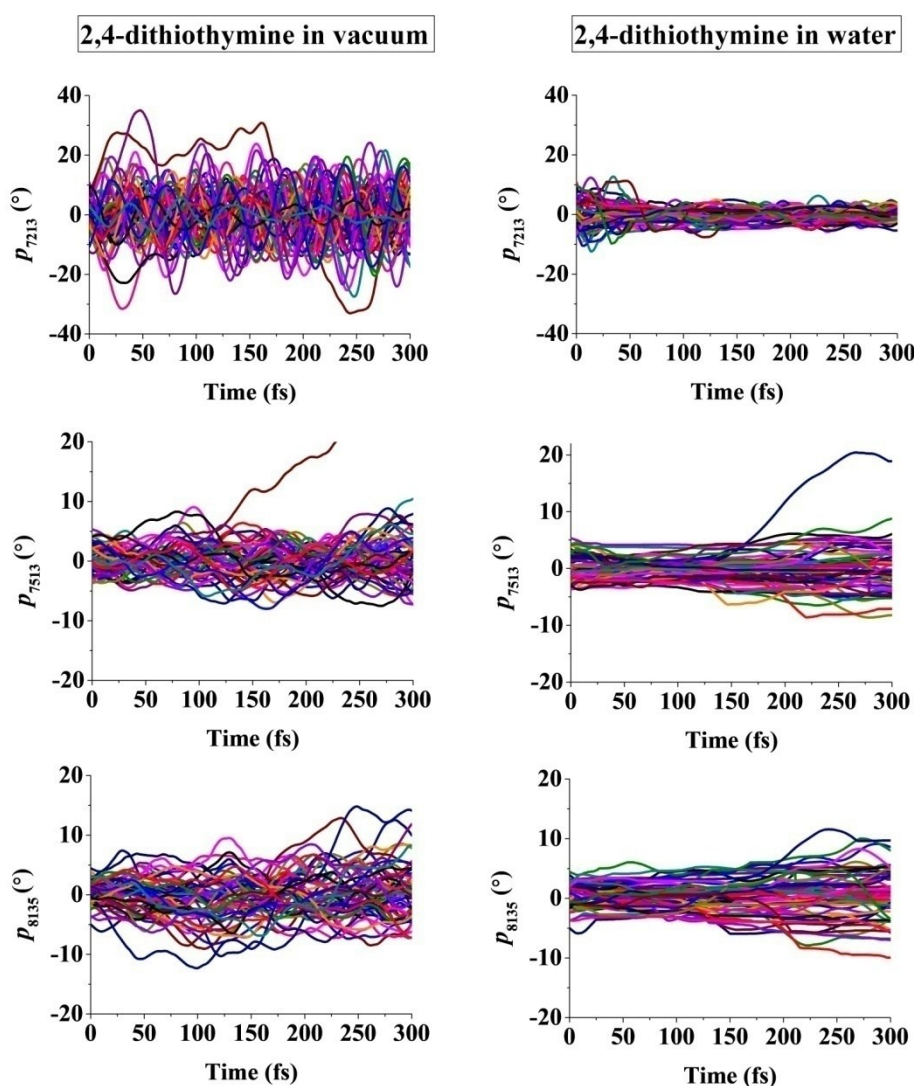

**Figure S9.** Time-evolution of the S7–C2–N1–N3 ( $p_{7213}$ ), S7–C5–N1–N3 ( $p_{7513}$ ), and S8–N1–N3–C5 ( $p_{8135}$ ) pyramidalization angles of 2,4-dithiothymine. Pyramidalization angle unit in degrees, °. Different trajectories are coded by color.

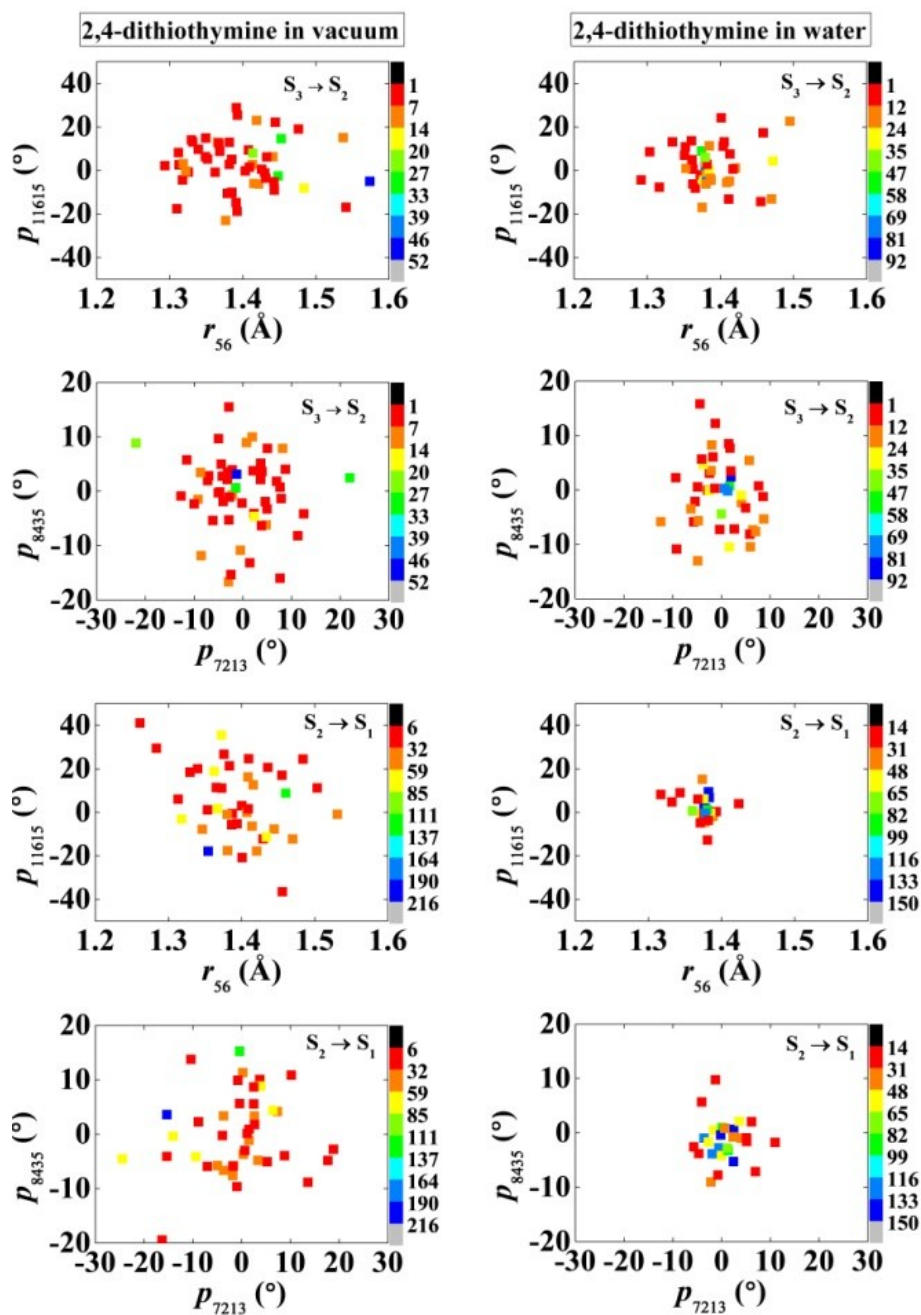

**Figure S10.** Distribution of both hopping time and key geometrical parameters at the  $S_3 \rightarrow S_2$  and  $S_2 \rightarrow S_1$  hopping points for 2,4-dithiothymine. Bond-length unit in angstrom, Å, and pyramidalization angle unit in degrees, °.



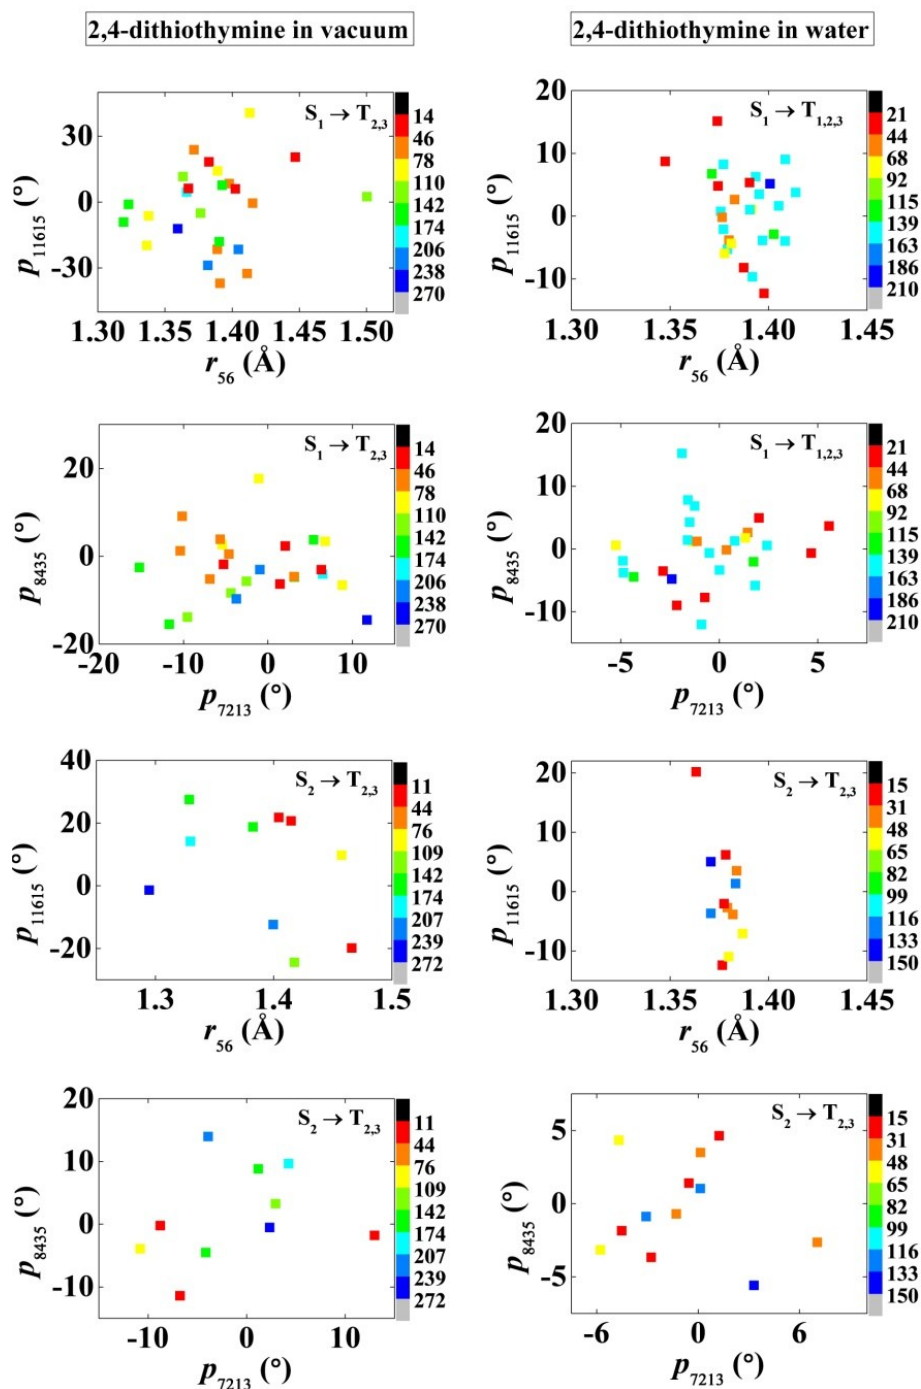

**Figure S11.** Distribution of bond-length and pyramidalization angles at the singlet-to-triplet crossing points (including  $S_1 \rightarrow T_{2,3}$  and  $S_2 \rightarrow T_{2,3}$  in vacuum, and  $S_1 \rightarrow T_{1,2,3}$  and  $S_2 \rightarrow T_{2,3}$  in water) for 2,4-dithiothymine. Bond-length unit in angstrom,  $\text{\AA}$ , and pyramidalization angle unit in degrees,  $^\circ$ .

**S1.** Cartesian coordinates of the structures optimized at the (TD-)B3LYP/6-31G\* level.

**4tT\_S0**

|   |            |             |             |
|---|------------|-------------|-------------|
| N | 0.13168000 | 0.00215100  | -3.14500200 |
| C | 0.06685500 | -1.31503700 | -2.70785600 |

|   |              |              |              |
|---|--------------|--------------|--------------|
| N | 0.001749000  | -1.408106000 | -1.323661000 |
| C | -0.004026000 | -0.382606000 | -0.386965000 |
| C | 0.067704000  | 0.957715000  | -0.945022000 |
| C | 0.132220000  | 1.084160000  | -2.296673000 |
| O | 0.065398000  | -2.273746000 | -3.456318000 |
| S | -0.089025000 | -0.740703000 | 1.237537000  |
| H | 0.180656000  | 0.121518000  | -4.147753000 |
| H | -0.047745000 | -2.354745000 | -0.961409000 |
| H | 0.187454000  | 2.052109000  | -2.783624000 |
| C | 0.069242000  | 2.157498000  | -0.040320000 |
| H | -0.834361000 | 2.182028000  | 0.577983000  |
| H | 0.918844000  | 2.125920000  | 0.650168000  |
| H | 0.123208000  | 3.083690000  | -0.621642000 |

**4tT<sub>-1n<sub>8</sub>π<sub>8</sub>\*</sub>**

|   |              |              |              |
|---|--------------|--------------|--------------|
| N | 0.132026000  | -0.009513000 | -3.152440000 |
| C | 0.065673000  | -1.312550000 | -2.708394000 |
| N | -0.000025000 | -1.415567000 | -1.319624000 |
| C | -0.000891000 | -0.335394000 | -0.434834000 |
| C | 0.066841000  | 0.954274000  | -0.940473000 |
| C | 0.134158000  | 1.112888000  | -2.323056000 |
| O | 0.065756000  | -2.286829000 | -3.441065000 |
| S | -0.090945000 | -0.762699000 | 1.286104000  |
| H | 0.180278000  | 0.088631000  | -4.156786000 |
| H | -0.047012000 | -2.366507000 | -0.980403000 |
| H | 0.189570000  | 2.073564000  | -2.814397000 |
| C | 0.068340000  | 2.150981000  | -0.022746000 |
| H | -0.841141000 | 2.187992000  | 0.589772000  |
| H | 0.925211000  | 2.130647000  | 0.662174000  |
| H | 0.122015000  | 3.081928000  | -0.594390000 |

**4tT<sub>-1π<sub>56</sub>π<sub>8</sub>\*</sub>**

|   |              |              |              |
|---|--------------|--------------|--------------|
| N | 0.120711000  | 0.004719000  | -3.139603000 |
| C | 0.066894000  | -1.309379000 | -2.716765000 |
| N | 0.011794000  | -1.392653000 | -1.305460000 |
| C | 0.010606000  | -0.337909000 | -0.440256000 |
| C | 0.065871000  | 0.953955000  | -0.910262000 |
| C | 0.122873000  | 1.112194000  | -2.343651000 |
| O | 0.065884000  | -2.283750000 | -3.450067000 |
| S | -0.071634000 | -0.955145000 | 1.287258000  |
| H | 0.160877000  | 0.102387000  | -4.148949000 |
| H | -0.028864000 | -2.326734000 | -0.907656000 |
| H | 0.171120000  | 2.071295000  | -2.840678000 |
| C | 0.068911000  | 2.172392000  | -0.031776000 |
| H | 0.051291000  | 1.883901000  | 1.021550000  |
| H | 0.963384000  | 2.787636000  | -0.202208000 |

|                                                     |              |              |              |
|-----------------------------------------------------|--------------|--------------|--------------|
| H                                                   | -0.805063000 | 2.810502000  | -0.224085000 |
| <b>4tT<sub>-3π<sub>56</sub>π<sub>8</sub>*</sub></b> |              |              |              |
| N                                                   | -0.007897000 | 0.003449000  | -3.138849000 |
| C                                                   | 0.060561000  | -1.317911000 | -2.702264000 |
| N                                                   | 0.129645000  | -1.427076000 | -1.328102000 |
| C                                                   | 0.134214000  | -0.356947000 | -0.410002000 |
| C                                                   | 0.063924000  | 0.931451000  | -0.896183000 |
| C                                                   | -0.010393000 | 1.115394000  | -2.313524000 |
| O                                                   | 0.058805000  | -2.265712000 | -3.468193000 |
| S                                                   | 0.234705000  | -0.828875000 | 1.290460000  |
| H                                                   | -0.059536000 | 0.102922000  | -4.144024000 |
| H                                                   | 0.182756000  | -2.369731000 | -0.966632000 |
| H                                                   | -0.068447000 | 2.083442000  | -2.789197000 |
| C                                                   | 0.062973000  | 2.160690000  | -0.031053000 |
| H                                                   | -0.832704000 | 2.765299000  | -0.222737000 |
| H                                                   | 0.089758000  | 1.902983000  | 1.027936000  |
| H                                                   | 0.931492000  | 2.792472000  | -0.258194000 |
| <b>4tT<sub>-3n<sub>8</sub>π<sub>8</sub>*</sub></b>  |              |              |              |
| N                                                   | 0.131918000  | -0.009530000 | -3.151139000 |
| C                                                   | 0.067523000  | -1.313770000 | -2.707811000 |
| N                                                   | 0.001386000  | -1.422651000 | -1.322631000 |
| C                                                   | 0.000053000  | -0.340545000 | -0.430583000 |
| C                                                   | 0.066421000  | 0.953531000  | -0.939521000 |
| C                                                   | 0.132295000  | 1.112140000  | -2.315332000 |
| O                                                   | 0.067334000  | -2.285470000 | -3.445001000 |
| S                                                   | -0.087096000 | -0.753112000 | 1.283355000  |
| H                                                   | 0.179462000  | 0.091525000  | -4.154685000 |
| H                                                   | -0.044949000 | -2.375469000 | -0.990263000 |
| H                                                   | 0.185386000  | 2.074270000  | -2.804420000 |
| C                                                   | 0.067315000  | 2.152347000  | -0.023806000 |
| H                                                   | -0.842894000 | 2.192449000  | 0.587447000  |
| H                                                   | 0.923888000  | 2.134497000  | 0.661577000  |
| H                                                   | 0.121814000  | 3.081635000  | -0.597743000 |
| <b>24dtT<sub>-S<sub>0</sub></sub></b>               |              |              |              |
| N                                                   | 0.132107000  | -0.004336000 | -3.136272000 |
| C                                                   | 0.066332000  | -1.305408000 | -2.699953000 |
| N                                                   | 0.001507000  | -1.404292000 | -1.331887000 |
| C                                                   | -0.004356000 | -0.379511000 | -0.388498000 |
| C                                                   | 0.067819000  | 0.961417000  | -0.944304000 |
| C                                                   | 0.132980000  | 1.083985000  | -2.296527000 |
| S                                                   | 0.064619000  | -2.612360000 | -3.730589000 |
| S                                                   | -0.089448000 | -0.747067000 | 1.230946000  |
| H                                                   | 0.181319000  | 0.115387000  | -4.139726000 |

|   |              |              |              |
|---|--------------|--------------|--------------|
| H | -0.048310000 | -2.349349000 | -0.963578000 |
| H | 0.189088000  | 2.047164000  | -2.792141000 |
| C | 0.069138000  | 2.159077000  | -0.039466000 |
| H | -0.834392000 | 2.180120000  | 0.579275000  |
| H | 0.918656000  | 2.124485000  | 0.651179000  |
| H | 0.122797000  | 3.086450000  | -0.618362000 |

**24dtΓ<sub>1n<sub>8</sub>π<sub>8</sub>\*</sub>**

|   |              |              |              |
|---|--------------|--------------|--------------|
| N | 0.130937000  | -0.029926000 | -3.132042000 |
| C | 0.065088000  | -1.316769000 | -2.696389000 |
| N | -0.000635000 | -1.438515000 | -1.325314000 |
| C | -0.002588000 | -0.363012000 | -0.424215000 |
| C | 0.065383000  | 0.929273000  | -0.921631000 |
| C | 0.133362000  | 1.093934000  | -2.304505000 |
| S | 0.063777000  | -2.643410000 | -3.712129000 |
| S | -0.093608000 | -0.805886000 | 1.284760000  |
| H | 0.179974000  | 0.077880000  | -4.136106000 |
| H | -0.048404000 | -2.390375000 | -0.987986000 |
| H | 0.189197000  | 2.052802000  | -2.798426000 |
| C | 0.066160000  | 2.119428000  | 0.002179000  |
| H | -0.843570000 | 2.149607000  | 0.614587000  |
| H | 0.922980000  | 2.092798000  | 0.686848000  |
| H | 0.119318000  | 3.054401000  | -0.562699000 |

**24dtΓ<sub>1π<sub>7</sub>π<sub>8</sub>\*</sub>**

|   |              |              |              |
|---|--------------|--------------|--------------|
| N | 0.132205000  | -0.031058000 | -3.154912000 |
| C | 0.065937000  | -1.244782000 | -2.650144000 |
| N | 0.001794000  | -1.416230000 | -1.360421000 |
| C | -0.004403000 | -0.321801000 | -0.346785000 |
| C | 0.067145000  | 0.960515000  | -0.938523000 |
| C | 0.134788000  | 1.141921000  | -2.301689000 |
| S | 0.064603000  | -2.674479000 | -3.759566000 |
| S | -0.091907000 | -0.801552000 | 1.264362000  |
| H | 0.180171000  | 0.065605000  | -4.158031000 |
| H | -0.048192000 | -2.355434000 | -0.981010000 |
| H | 0.192082000  | 2.086767000  | -2.817081000 |
| C | 0.069283000  | 2.163998000  | -0.038986000 |
| H | -0.833555000 | 2.171975000  | 0.581263000  |
| H | 0.916893000  | 2.115735000  | 0.653286000  |
| H | 0.123011000  | 3.094581000  | -0.611668000 |

**24dtΓ<sub>3π<sub>8</sub>π<sub>8</sub>\*</sub>**

|   |              |              |              |
|---|--------------|--------------|--------------|
| C | -0.678646000 | -1.371557000 | -0.052004000 |
| C | -1.026791000 | -0.044737000 | 0.075707000  |
| C | 1.345487000  | 0.666382000  | -0.003533000 |
| C | 0.715093000  | -1.695036000 | -0.158260000 |
| H | 1.095515000  | -2.700200000 | -0.261498000 |

|                                                      |              |              |              |
|------------------------------------------------------|--------------|--------------|--------------|
| N                                                    | 0.007337000  | 0.920920000  | 0.094551000  |
| H                                                    | -0.258238000 | 1.892618000  | 0.188157000  |
| N                                                    | 1.642857000  | -0.669058000 | -0.128474000 |
| H                                                    | 2.631800000  | -0.872563000 | -0.202902000 |
| S                                                    | -2.658770000 | 0.602200000  | 0.221817000  |
| S                                                    | 2.527021000  | 1.845722000  | 0.022968000  |
| C                                                    | -1.663262000 | -2.503811000 | -0.087735000 |
| H                                                    | -2.688535000 | -2.145028000 | 0.003583000  |
| H                                                    | -1.568256000 | -3.063727000 | -1.027133000 |
| H                                                    | -1.462993000 | -3.210573000 | 0.727927000  |
| <b>24dtT_<sup>3</sup>n<sub>8</sub>π<sub>8</sub>*</b> |              |              |              |
| N                                                    | 0.130995000  | -0.030711000 | -3.130938000 |
| C                                                    | 0.065419000  | -1.318999000 | -2.694813000 |
| N                                                    | -0.000746000 | -1.444274000 | -1.328229000 |
| C                                                    | -0.002622000 | -0.368861000 | -0.420196000 |
| C                                                    | 0.065251000  | 0.928701000  | -0.921222000 |
| C                                                    | 0.132358000  | 1.092766000  | -2.296109000 |
| S                                                    | 0.064118000  | -2.642191000 | -3.716575000 |
| S                                                    | -0.091460000 | -0.796190000 | 1.284768000  |
| H                                                    | 0.179934000  | 0.079503000  | -4.134210000 |
| H                                                    | -0.049089000 | -2.398026000 | -0.997034000 |
| H                                                    | 0.187800000  | 2.052969000  | -2.787762000 |
| C                                                    | 0.066200000  | 2.121539000  | 0.000127000  |
| H                                                    | -0.844467000 | 2.155457000  | 0.610886000  |
| H                                                    | 0.922148000  | 2.096265000  | 0.685886000  |
| H                                                    | 0.121533000  | 3.054280000  | -0.567649000 |
